# Supplementary material
Source: Research Square preprint supplement (doi:10.21203/rs.3.rs-9334347/v1)
Supplement: Supplementary file 1 [file 57b95fcf6781f3d0a74dc10b.docx]

# Representative raw images collected during the study period.

1. Sampling material, cattle’s, blood sample collection, blood sample, serum and follow up

| 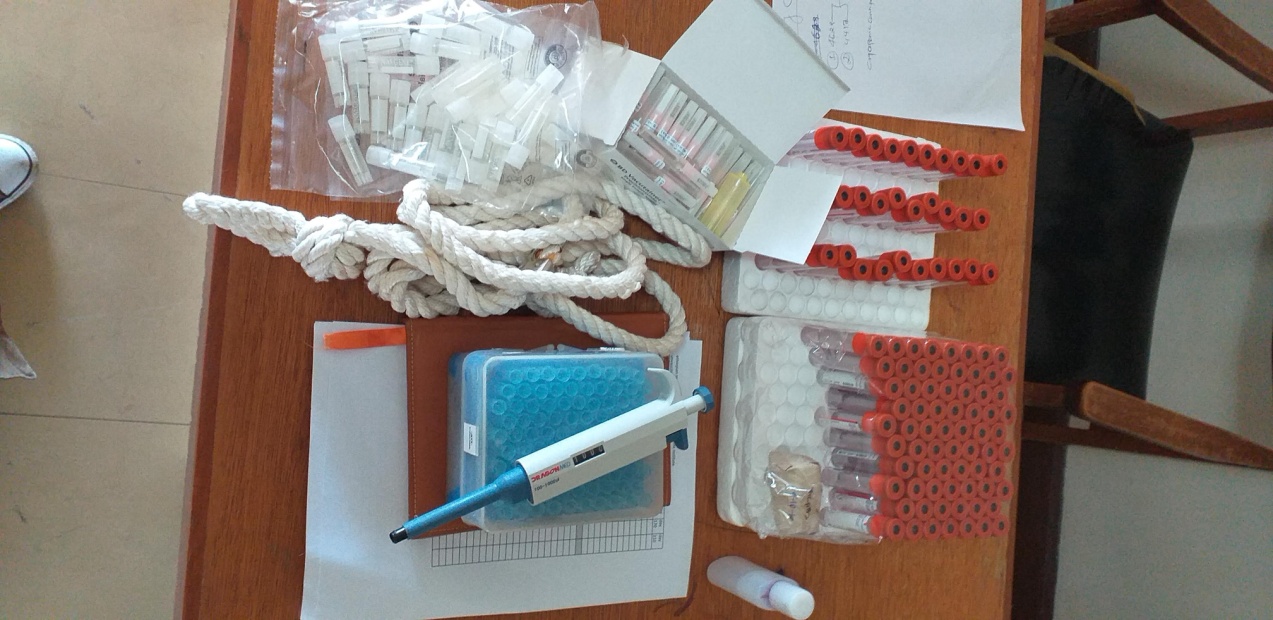 | 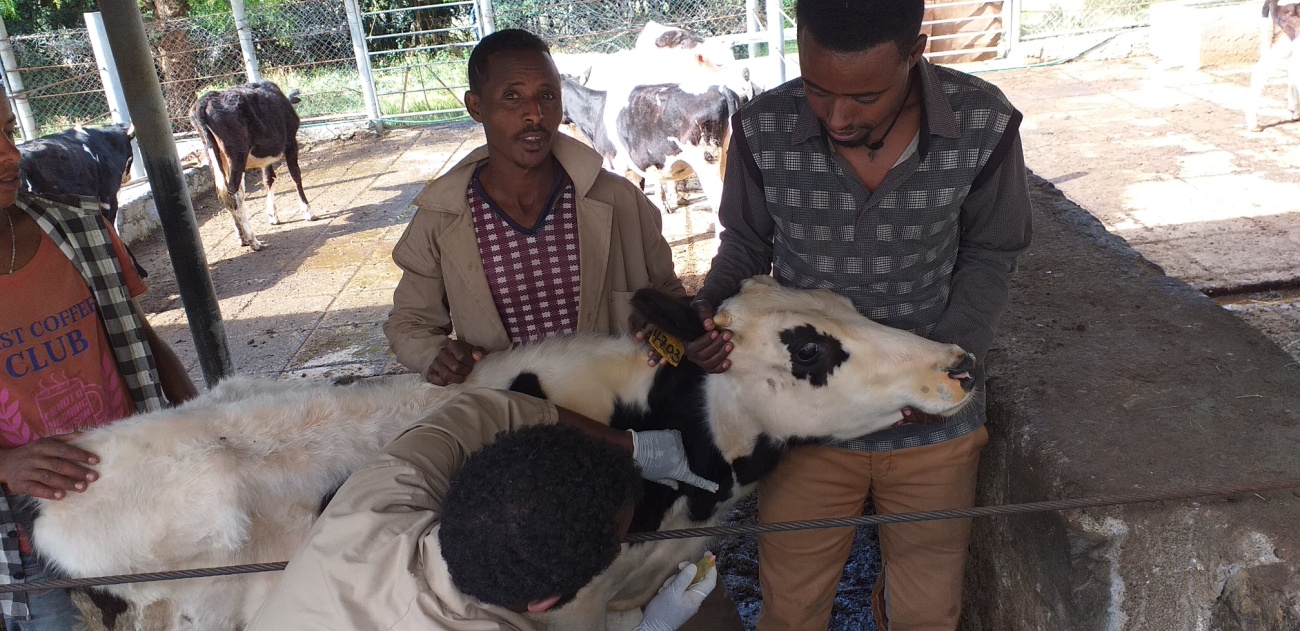 |
| --- | --- |
| 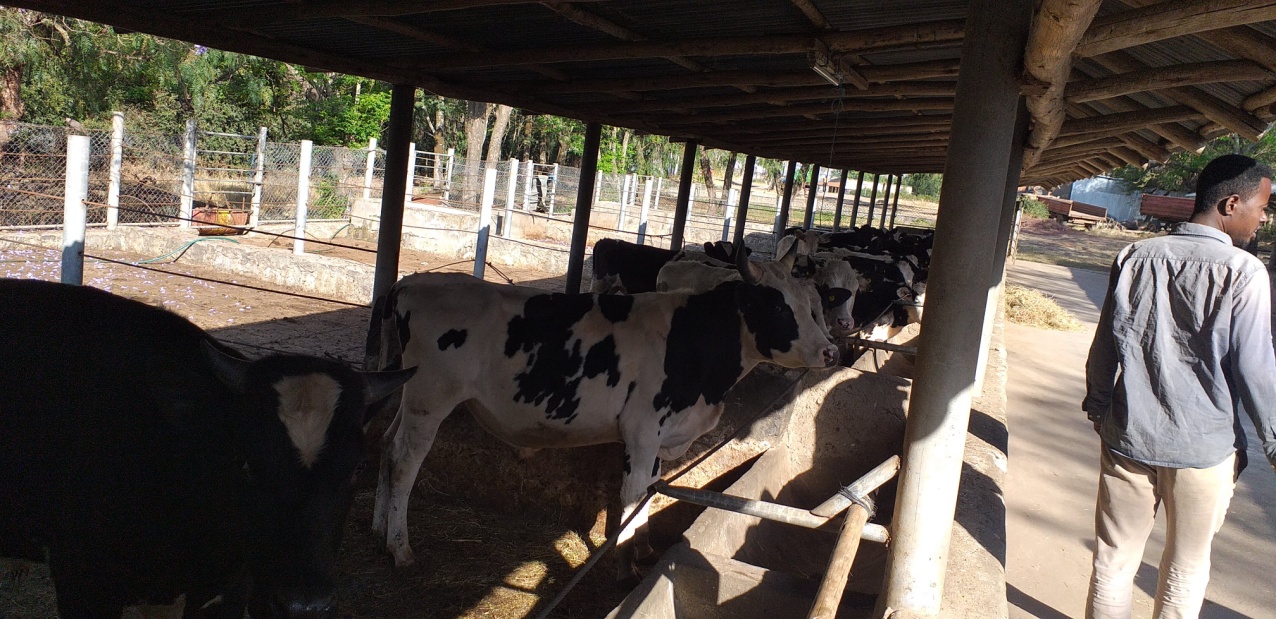 | 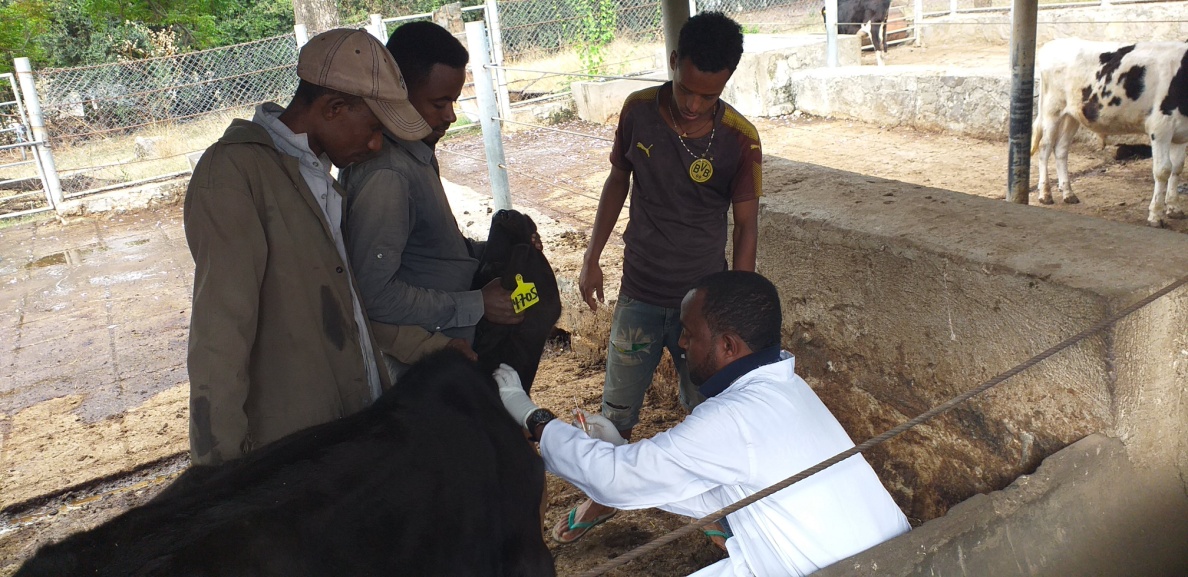 |
| 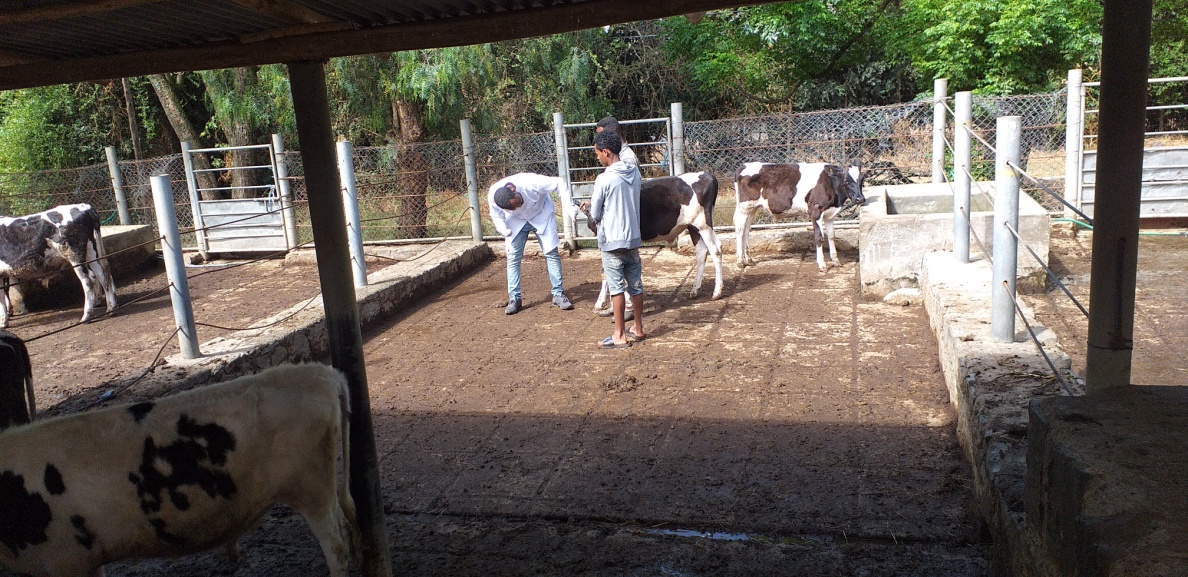 | 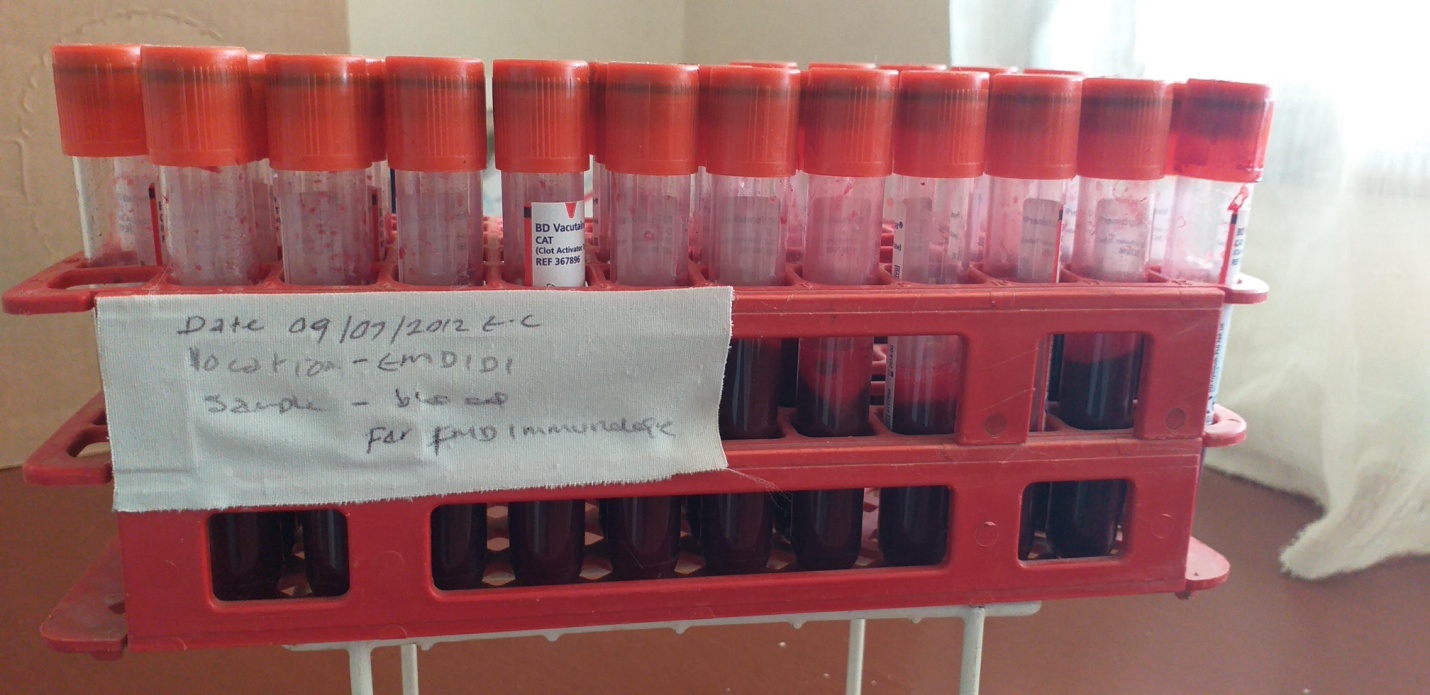 |
| 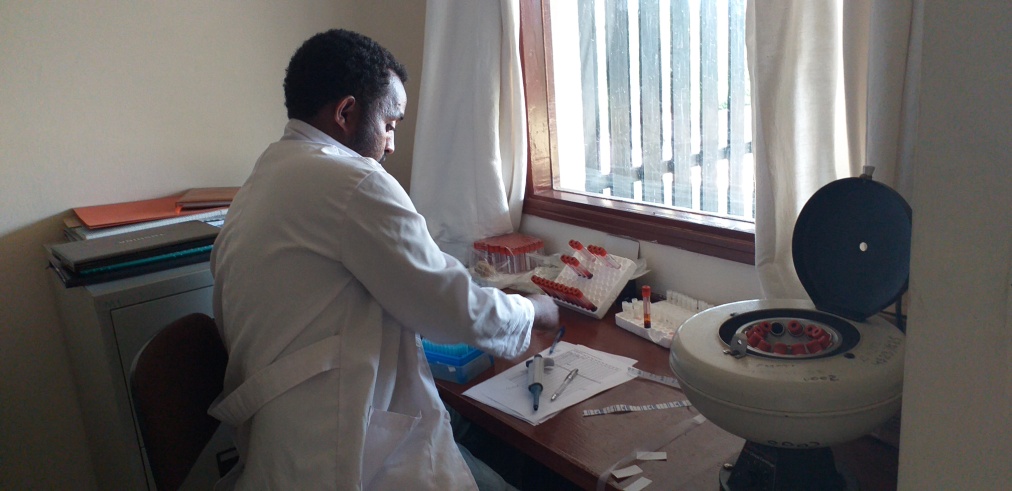 | 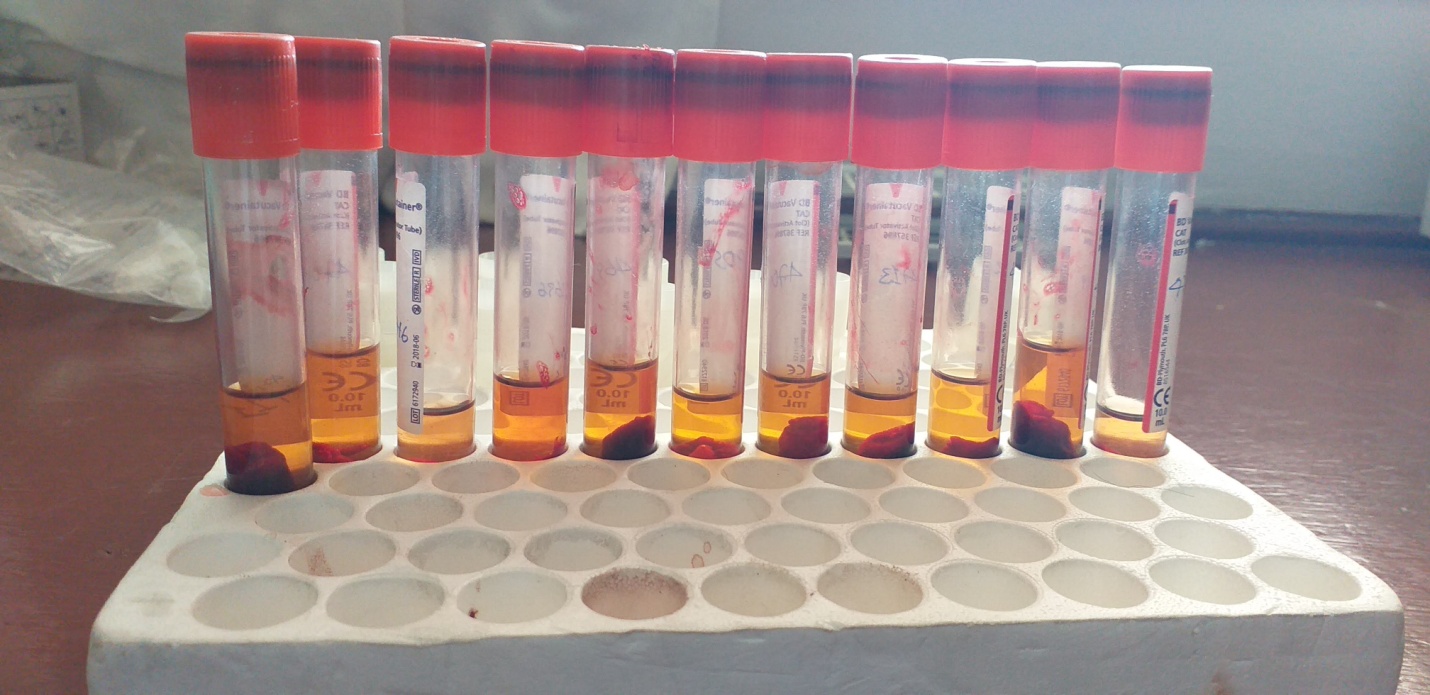 |
| 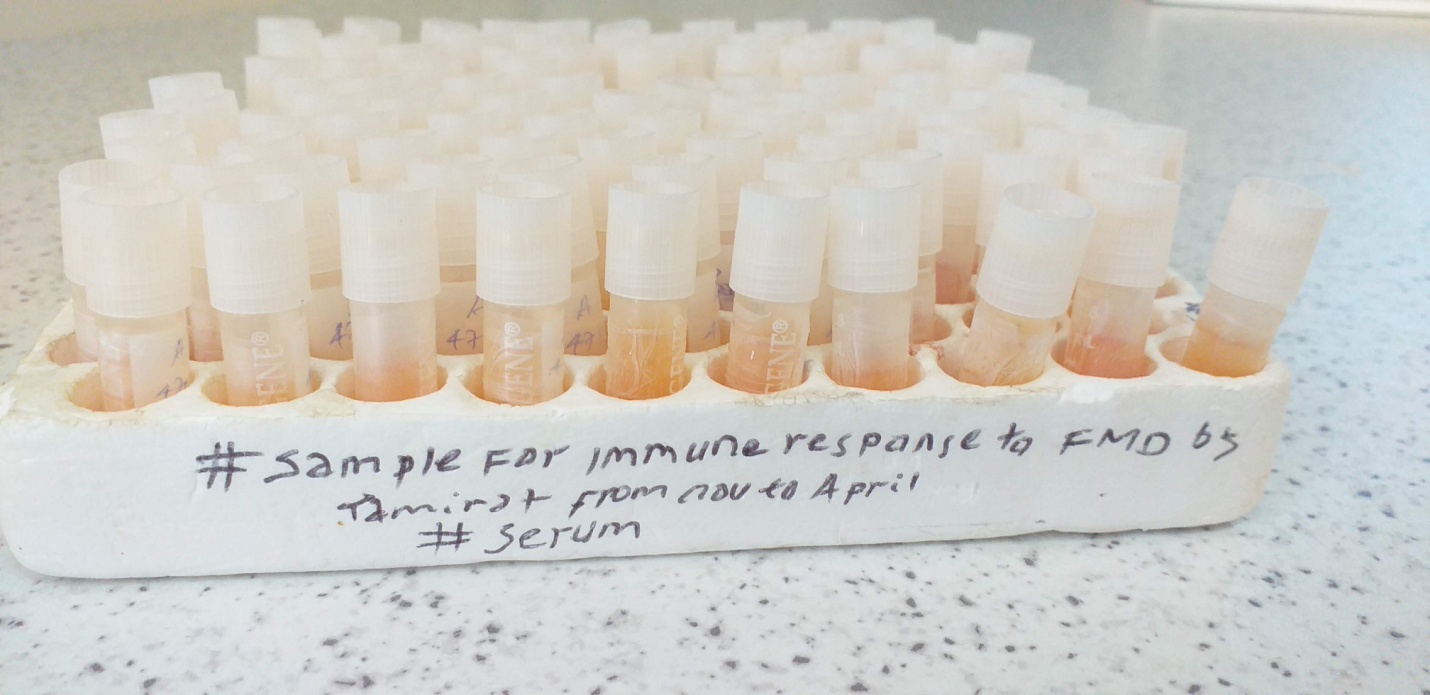 |  |

1. Working on Bio-safety level II (**Culturing and preparation of BHK-21 cell)** Flask 75cm2 used for BHK-21 cell preparation and for sub-culturing

| 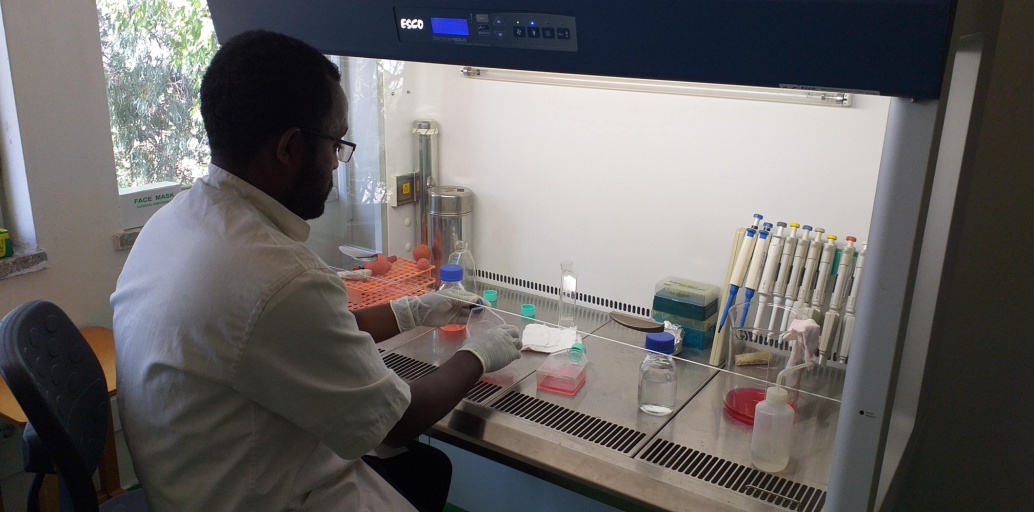 | 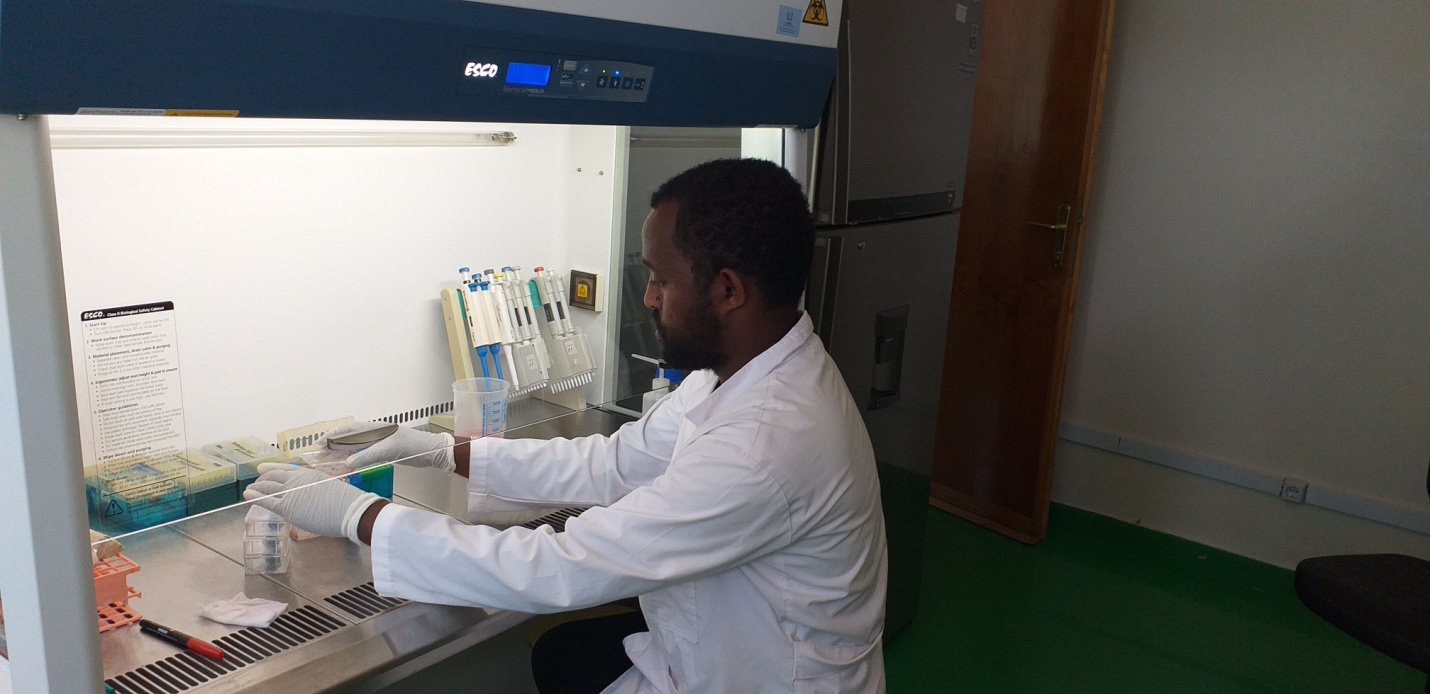 |
| --- | --- |
| 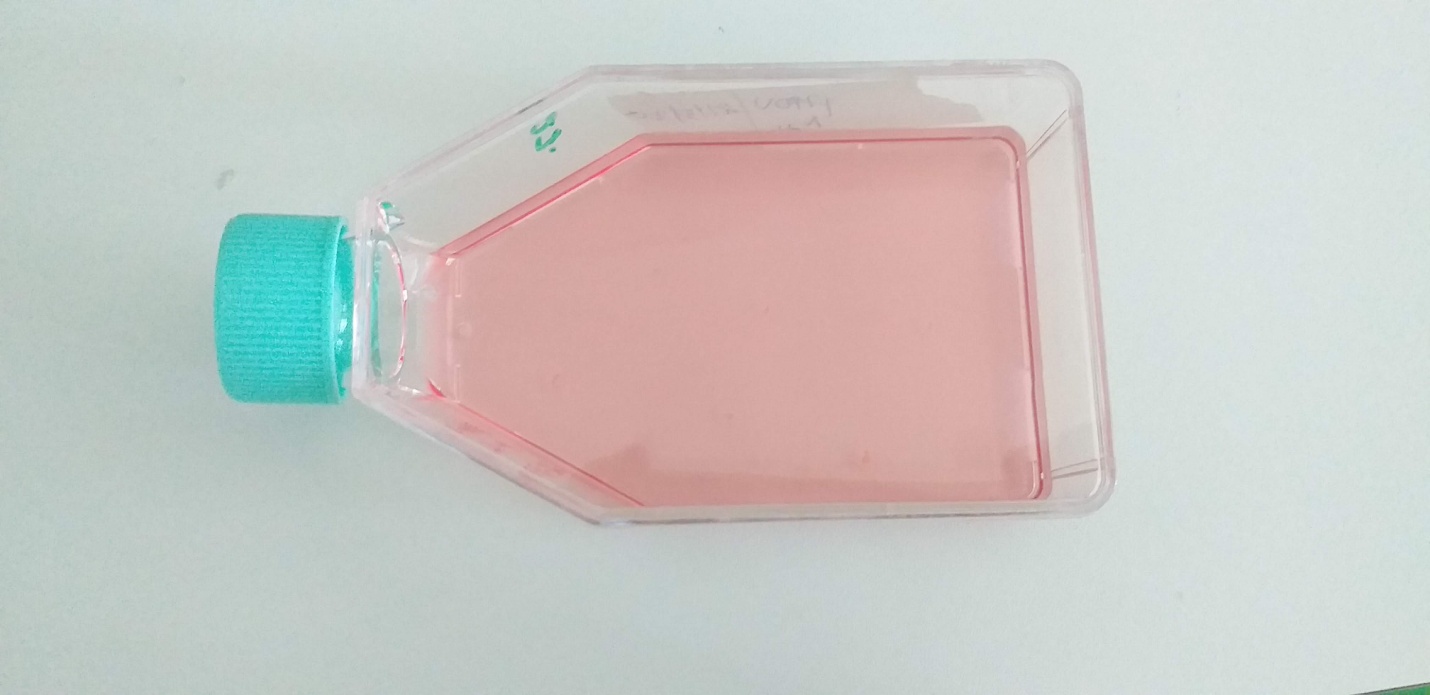 |  |

1. **Deactivating serum sample with 560c with water bath**


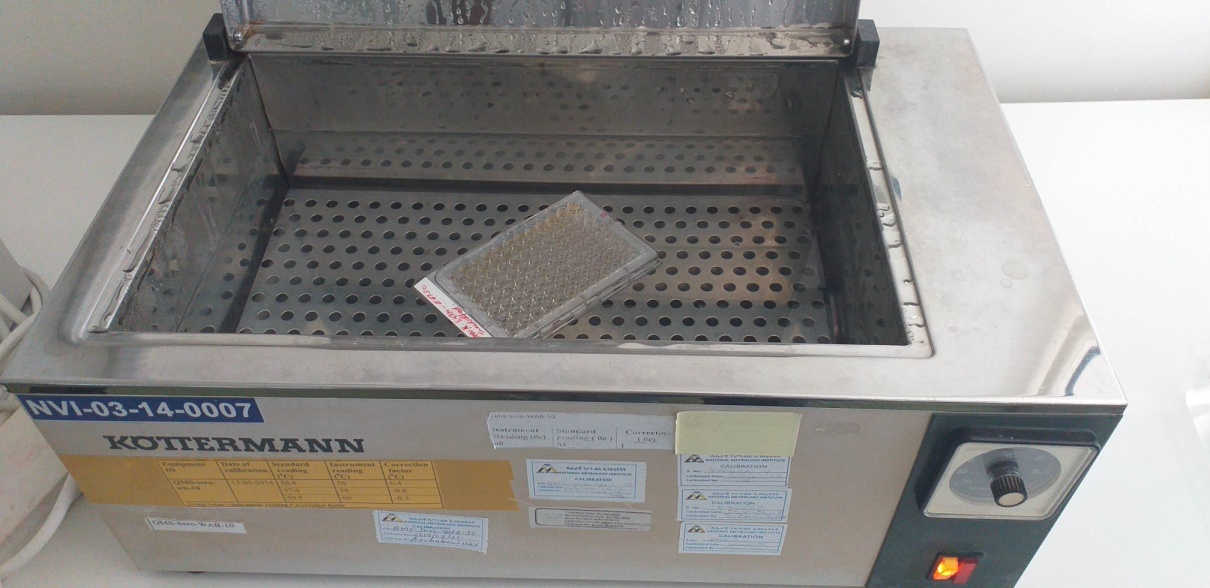


1. **Seed strain virus and 100TCID50 of seed strain (A/ETH/21/2000, O/ETH/38/2005 AND SAT2/ETH/64/2009.**

| 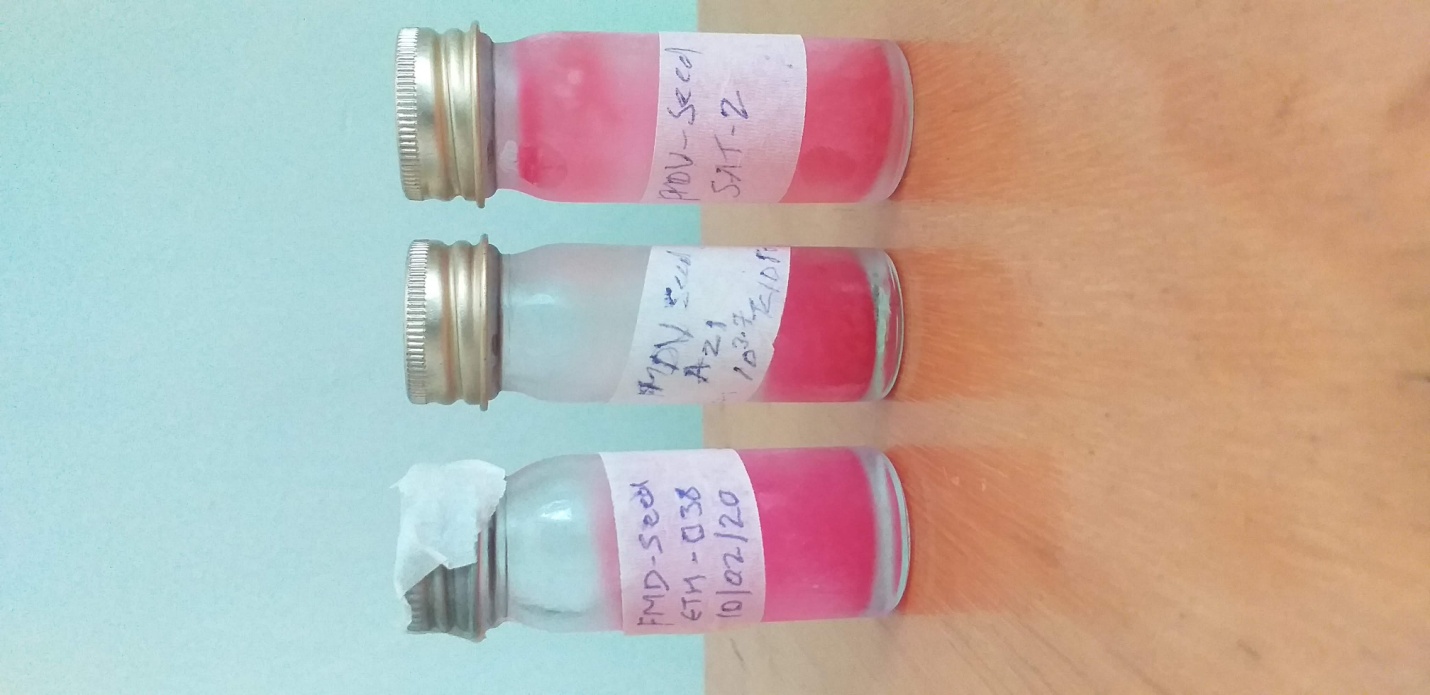 | 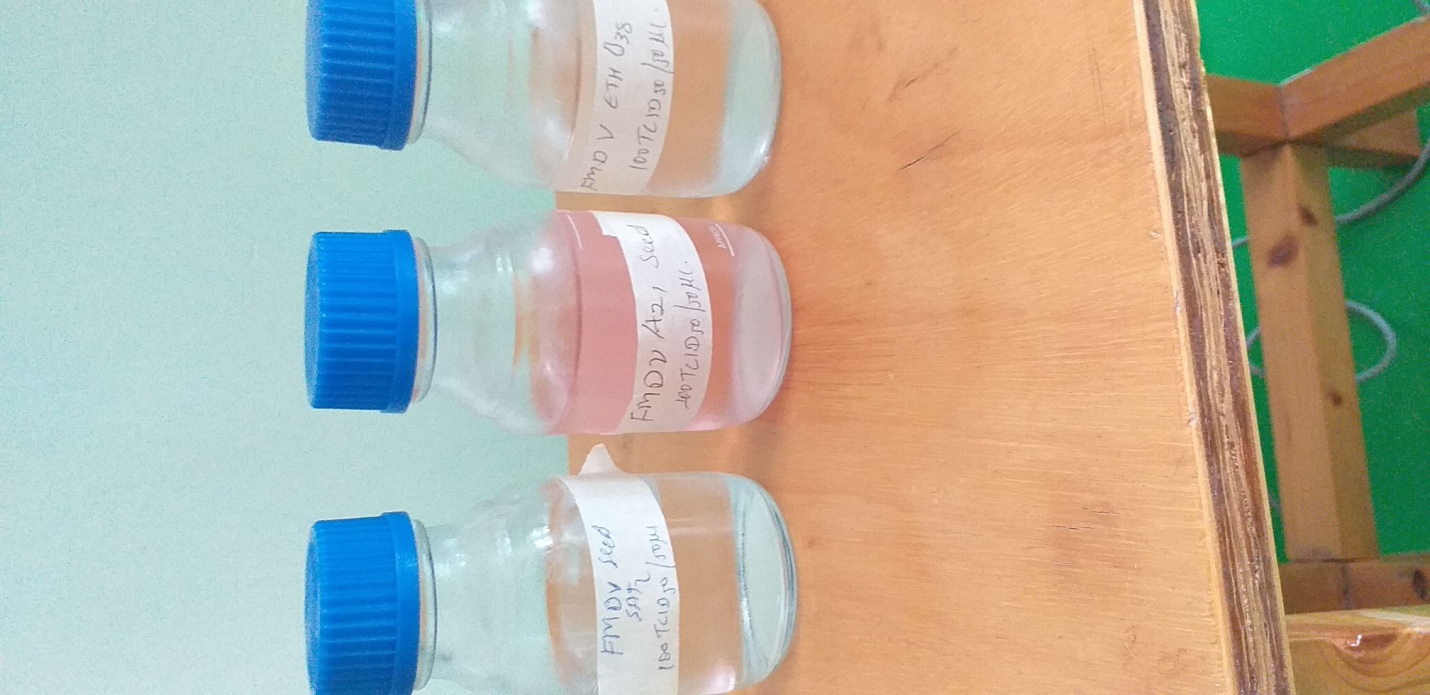 |
| --- | --- |

1. Counting of the BHK-21 cell with EVETM Automatic cell counter

| 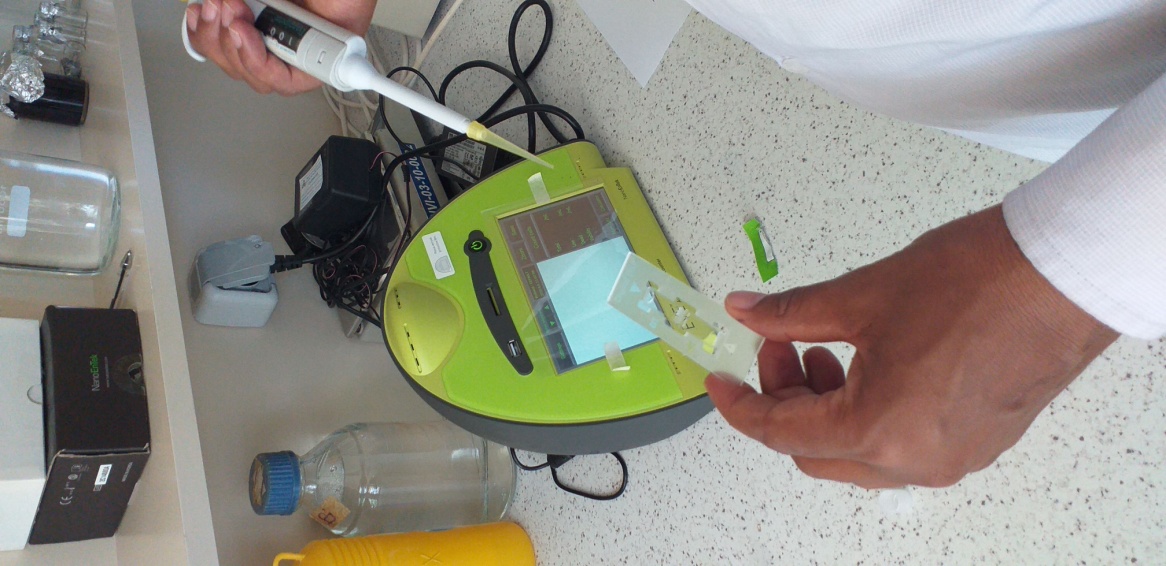 | 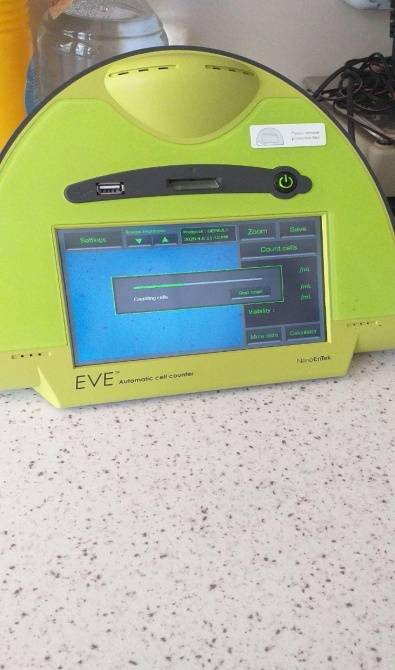 | 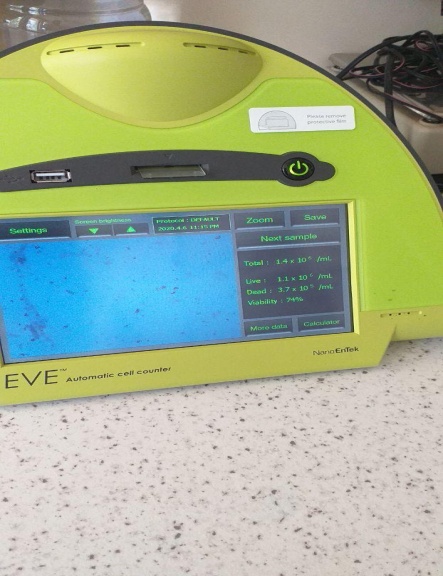 |
| --- | --- | --- |

1. Tissue culture plate

| 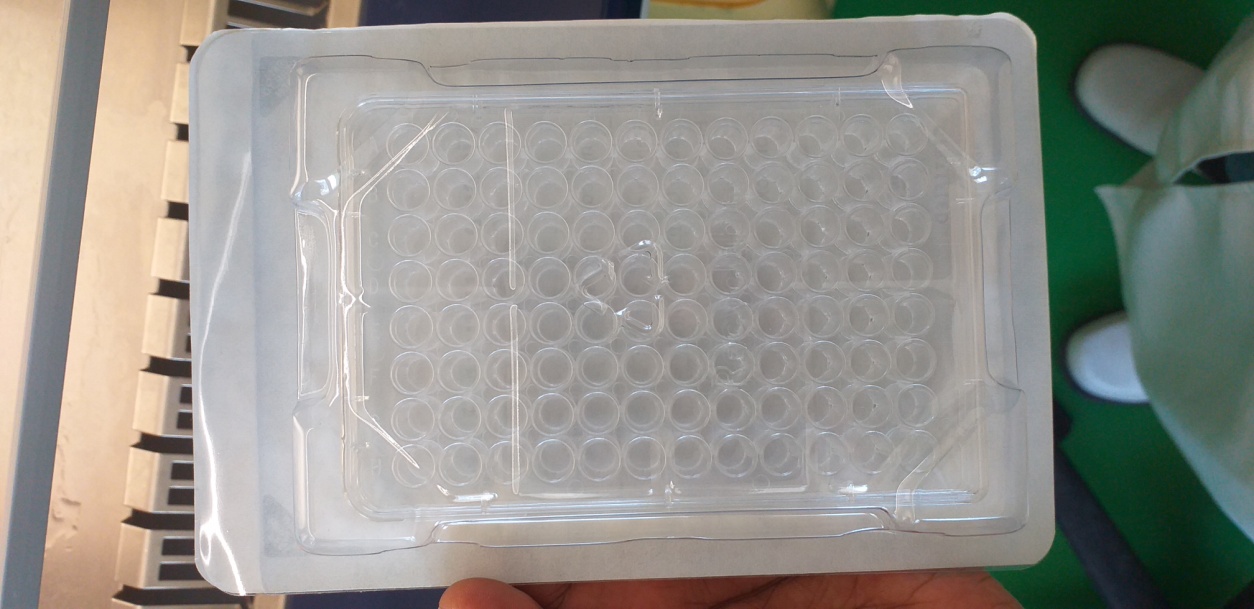 | 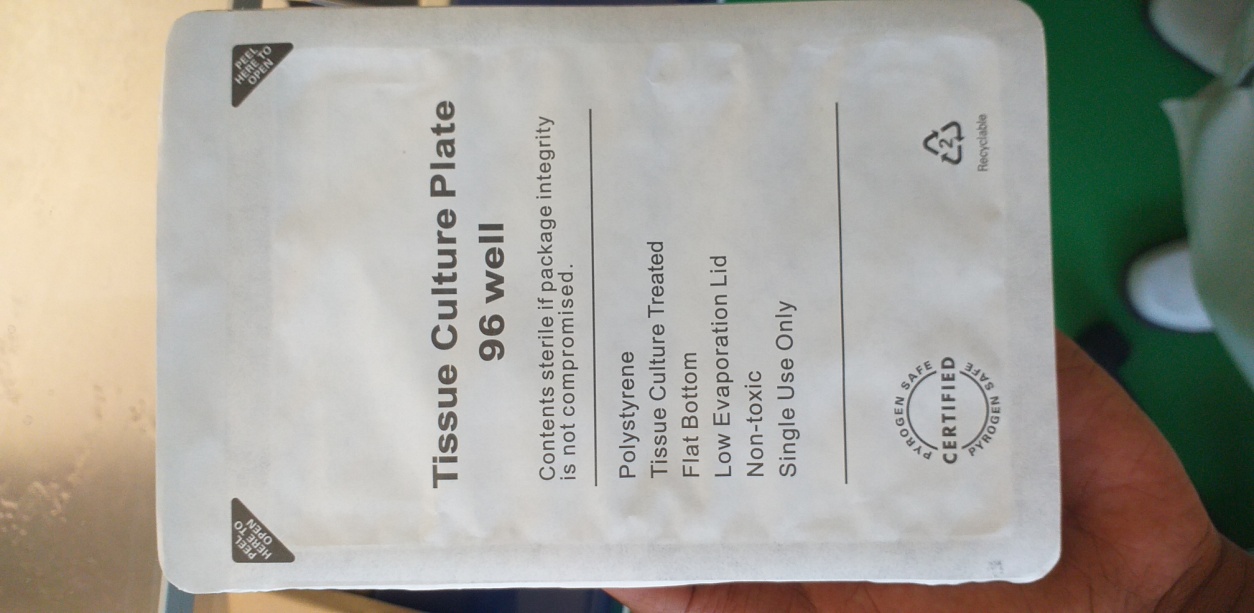 |
| --- | --- |

1. Incubation in the 5% CO2 incubator


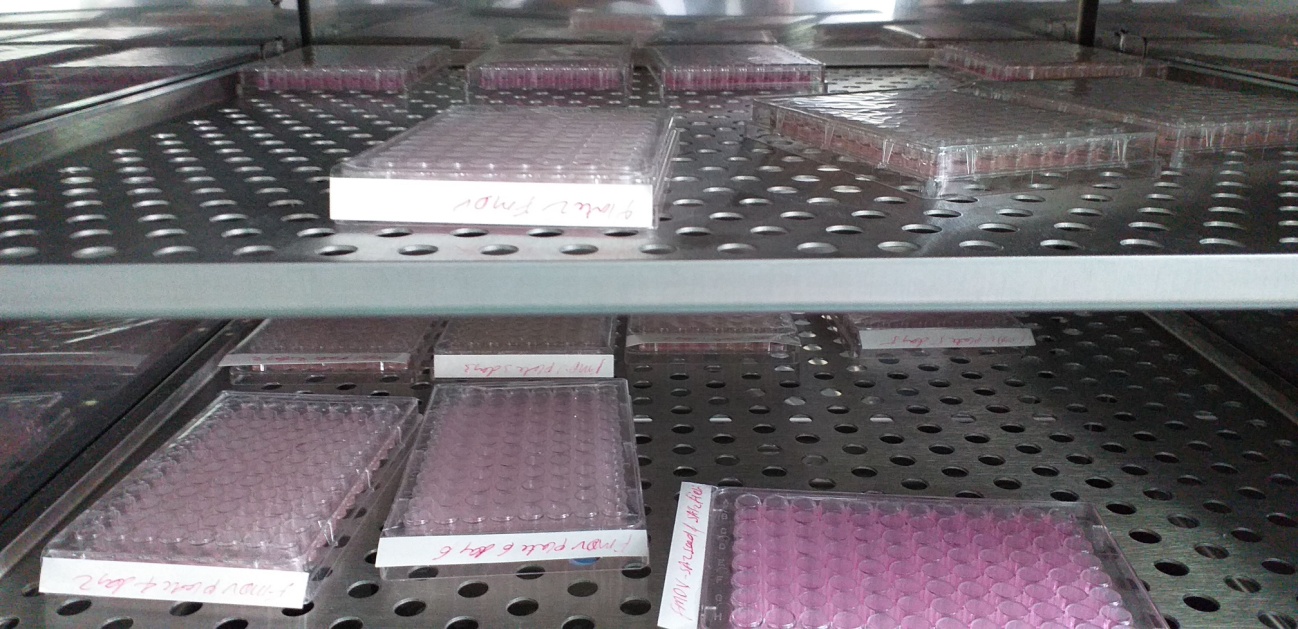


1. Reading of VNT with inverted microscope


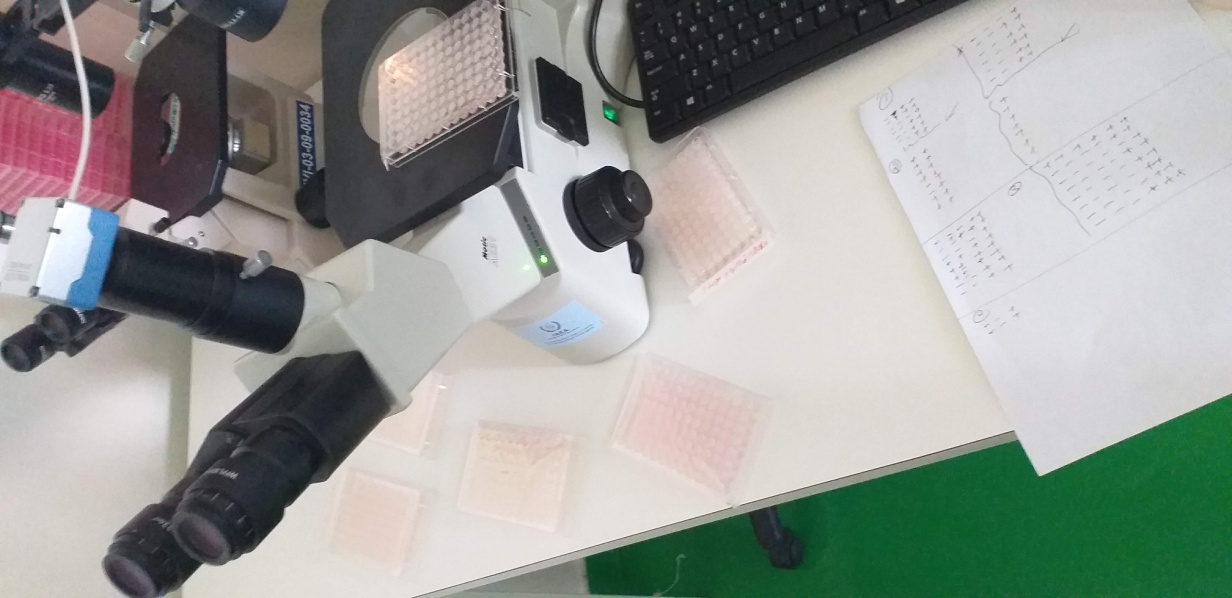


1. Denaturing with UV light for 30 minutes after work has been finished

| 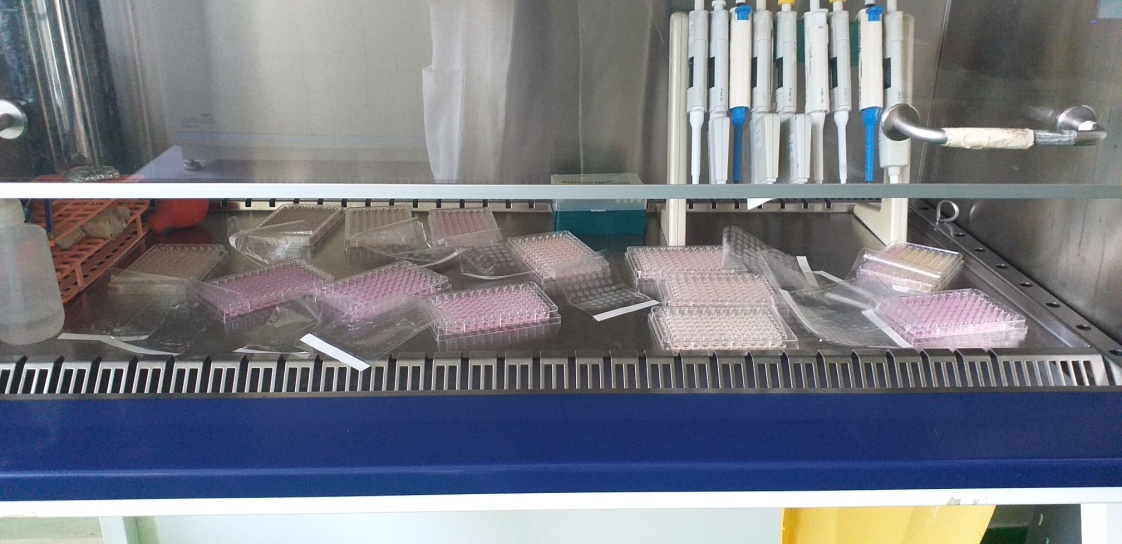 | 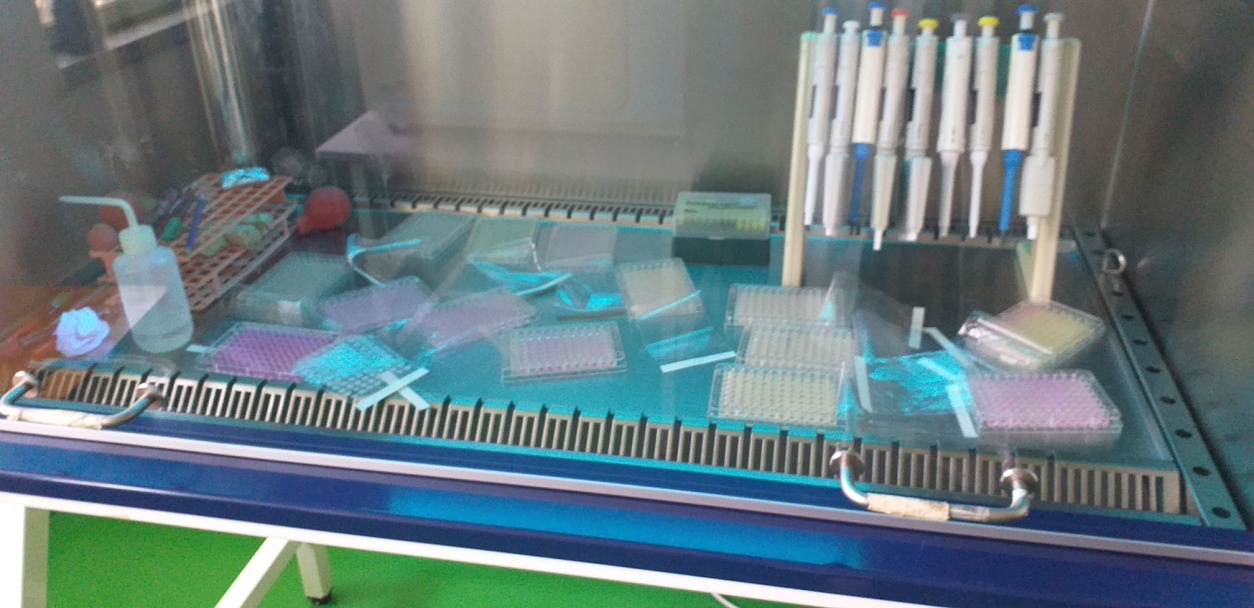 |
| --- | --- |
