# Supplementary material
Source: Research Square preprint supplement (doi:10.21203/rs.3.rs-9334347/v1)
Supplement: Supplementary file 2 [file b37fde33e9b0e0ec3ebf095b.docx]

## **Annex-1: Adaptation of FMDV in Baby Hamster Kidney-21 Cell Culture**

1. The cells those formed confluent monolayers in the culture flask within 24 hr of incubation were selected for infection with viruses.
2. The growth media from the flask containing BHK-21 cell was removed and then the monolayer cells were washed with 1X sterile PBS for 2 times.
3. One milliliter (1mL) of virus inoculum was added to the 25 cm2 polystyrene TPP® tissue culture flasks (Sigma-Aldrich, Europe). The inoculum was spread over the monolayer cell by tilting for about 45-60 min for the establishment of better interaction.
4. Add 6-8 mL maintenance media was added in flask and the vessel was returned to the incubator at 37°C for 1–2 days.
5. Virus added flask was allowed to incubate at 37°C for 1-2 days. The cells were examined twice daily under inverted microscope until showing characteristic cytopathic effect (CPE).
6. A control monolayer cell also was maintained. After completion of CPE, infected cell culture bottle along with control cell monolayer were stored at –20°C. The cell culture supernatant was harvested by repeated freezing and thawing for 3 to 4 times.

**Annexe-2: FMDV Seed Strain Titration**

Foot and mouth disease virus vaccine strains were titrated after being adapted on monolayer BHK-21 cell culture and showed 100% CPE in 24 hours.

1. Serial dilute in tenfold dilution beginning with 10-1 by adding l00µl of the virus suspension to 900µl of the diluents minimum essential base medium (MEM).
2. Using a sterile pipette tip, l00µl from the first dilution was taken and transferred to the next tube after vortexing and continued serially to the end using different sterile pipette tips at each transfer.
3. l00µl of each virus dilution (10-1 to 10-12) was distributed in the wells of respective rows on microtiter plates containing established monolayer’s cell of BHK- 21 100 µl containing 106 cell per each well.
4. Then 100 μl/well of MEM base medium was added and incubated at 37° C for 48 h and the titer of each virus was determined by the use of Reed and muench formula.

Applying the index calculated using this formula t the dilution that produces the infection rate immediately above 50 = 103.74

This dilution of the virus suspension contained 100TCID50 unit of virus in 0.1ml.

1ml of the virus suspension will contain ten times the reciprocal of the calculation dilution.

Therefore, infectivity titer of the virus suspension inTCID50/ml = 10*103.74 =104.74TCID50/ml the result was similar for the three serotypes.
